# Supplementary material for: Evolutionary evidence for multi-host transmission of cetacean morbillivirus
Source: PubMed Central journal article supplement (PMC6279766; doi:10.1038/s41426-018-0207-x), 2018-12-05
Supplement: 41426_2018_207_MOESM1_ESM.pdf [file 41426_2018_207_MOESM1_ESM.pdf]

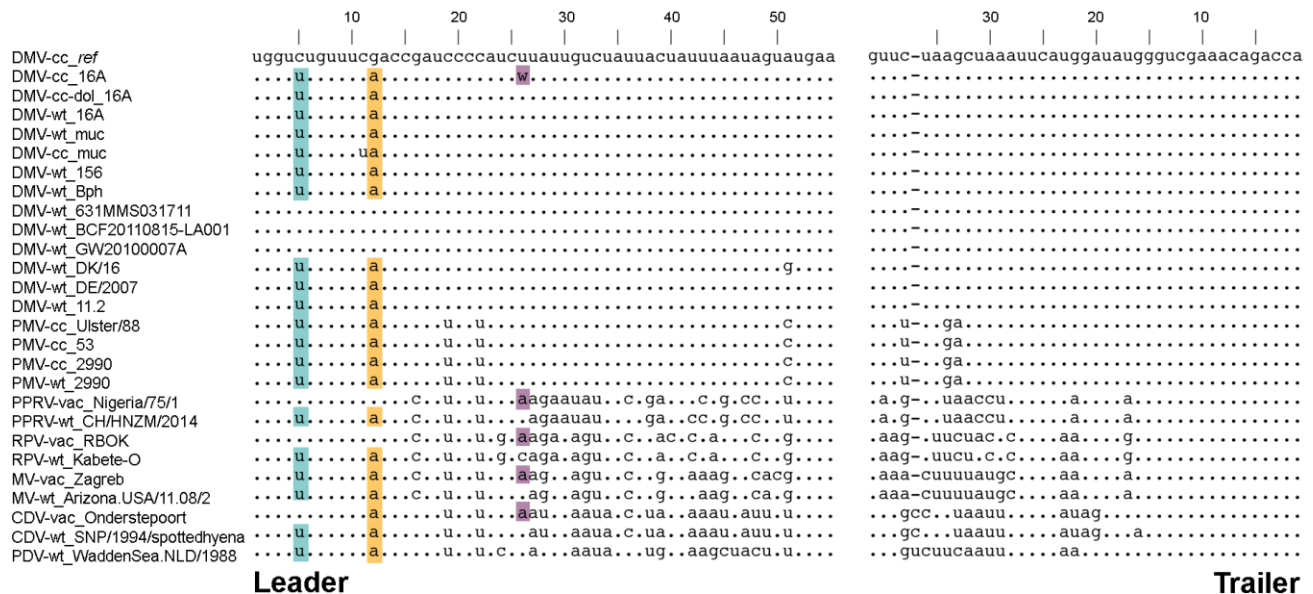

**Supplementary Fig. 1** Genome termini alignment of CeMV sequences and other morbilliviruses. Abbreviations: cc, cell-culture; wt, wild-type; vac, vaccine. GenBank accession numbers: DMV-cc\_ref (AJ608288); DMV-cc\_16A (MH430932); DMV-cc\_dol\_16A (MH430933), DMV-wt\_16A (MH430934); DMV-wt\_muc (MH430935); DMV-cc\_muc (MH430936); DMV-wt\_156 (MH430937); DMV-wt\_Bph (MH430938); DMV-wt\_-631IMMS031711 (KU720625); DMV-wt\_BCF20110815-LA001 (KU720624); DMV-wt\_GW2010007A (KU720623), DMV-wt\_DK/16 (MH430939); DMV-wt\_DE/2007 (MH430940); DMV-wt\_11.2 (MH430941); PMV-cc\_Ulster/88 (MH430942); PMV-cc\_53 (MH430943); PMV-cc\_2990 (MH430944); PMV-wt\_2990 (MH430945); PPRV-vac\_Nigeria/75/1 (X74443); PPRV-wt\_CH/HNZM/2014 (KM089832); RPV-vac\_RBOK (Z30697), RPV-wt\_Kabete-O (X98291); MV-vac\_Zagreb (AF266290); MV-Mvi/Arizona.USA/11.08/2 (JN635406.1); CDV-vac\_-Onderstepoort (AF305419); CDV-wt\_SNP/1994/spottel\_hyena\_1 (KU578255); PDV-wt\_Wadden\_Sea.NLD/1988 (KC802221).
