# Supplementary material for: Evolutionary evidence for multi-host transmission of cetacean morbillivirus
Source: PubMed Central journal article supplement (PMC6279766; doi:10.1038/s41426-018-0207-x), 2018-12-05
Supplement: 41426_2018_207_MOESM3_ESM.pdf [file 41426_2018_207_MOESM3_ESM.pdf]

| Sequence                              | 34 | 93 | 100 | 107 | 120 | 122 | 127 | 138 | 154 | 180 | 185 | 189 | 318 | 473 | 490 | 508 | 552 |
|---------------------------------------|----|----|-----|-----|-----|-----|-----|-----|-----|-----|-----|-----|-----|-----|-----|-----|-----|
| Sc-ES/1990_AJ608288                   | V  | D  | H   | L   | I   | G   | C   | S   | A   | K   | T   | H   | S   | R   | P   | F   | Q   |
| Sc-ES/1990 16A                        | L  | D  | H   | L   | I   | R   | C   | G   | A   | K   | T   | R   | S   | R   | P   | F   | K   |
| Sc-ES/1990 muc                        | L  | D  | H   | L   | I   | K   | C   | G   | A   | K   | T   | R   | S   | K   | P   | F   | K   |
| Bp-DK/2016                            | L  | D  | H   | L   | I   | K   | C   | G   | A   | K   | T   | R   | G   | R   | P   | F   | K   |
| Sc-IT/2008 IZSPLV_MF589987            | L  | D  | H   | L   | I   | R   | C   | G   | A   | Q   | T   | R   | S   | R   | P   | F   | K   |
| Sc-IT/2010 156                        | L  | D  | H   | L   | I   | K   | C   | G   | A   | K   | T   | R   | S   | R   | P   | F   | K   |
| Bp-IT/2013 Bph                        | L  | D  | H   | L   | I   | K   | C   | G   | A   | K   | T   | R   | S   | R   | P   | F   | K   |
| Sl-US/2010 GW2010007A_KU720623        | L  | D  | H   | L   | I   | K   | C   | G   | A   | K   | T   | R   | S   | R   | P   | L   | K   |
| Tt-US/2011 631MMS031711_KU720625      | L  | D  | H   | L   | I   | K   | C   | G   | A   | K   | T   | R   | S   | R   | L   | F   | K   |
| Tt-US/2011 BCF20110815-LA001_KU720624 | L  | D  | H   | L   | I   | K   | C   | G   | A   | K   | T   | R   | S   | R   | P   | F   | K   |
| La-DE/2007                            | L  | A  | H   | S   | I   | K   | C   | G   | V   | K   | I   | R   | S   | R   | P   | F   | K   |
| La-NL/2011 11.2                       | L  | A  | Q   | L   | S   | K   | G   | G   | V   | K   | I   | R   | S   | R   | P   | F   | K   |

| Sequence                              | 639 | 720 | 791 | 811 | 841 | 873 | 1006 | 1016 | 1036 | 1037 | 1039 | 1041 | 1056 | 1069 | 1070 | 1075 | 1111 |
|---------------------------------------|-----|-----|-----|-----|-----|-----|------|------|------|------|------|------|------|------|------|------|------|
| Sc-ES/1990_AJ608288                   | G   | M   | L   | L   | M   | T   | V    | I    | A    | D    | H    | V    | R    | A    | V    | L    | S    |
| Sc-ES/1990 16A                        | G   | M   | L   | L   | M   | I   | V    | I    | D    | E    | Q    | E    | I    | T    | G    | I    | F    |
| Sc-ES/1990 muc                        | G   | M   | L   | L   | M   | T   | V    | I    | D    | E    | Q    | E    | I    | T    | G    | I    | F    |
| Bp-DK/2016                            | G   | I   | L   | L   | M   | T   | V    | I    | D    | E    | Q    | E    | I    | T    | G    | I    | F    |
| Sc-IT/2008 IZSPLV_MF589987            | G   | M   | L   | L   | M   | T   | V    | I    | D    | E    | Q    | E    | I    | T    | G    | I    | F    |
| Sc-IT/2010 156                        | G   | M   | L   | L   | M   | T   | V    | I    | D    | E    | Q    | E    | I    | T    | G    | I    | F    |
| Bp-IT/2013 Bph                        | G   | M   | L   | L   | M   | T   | V    | I    | D    | E    | Q    | E    | I    | T    | G    | I    | F    |
| Sl-US/2010 GW2010007A_KU720623        | G   | M   | L   | L   | T   | T   | V    | I    | D    | E    | Q    | E    | I    | T    | G    | I    | F    |
| Tt-US/2011 631MMS031711_KU720625      | G   | M   | L   | L   | T   | T   | V    | I    | D    | E    | Q    | E    | I    | T    | G    | I    | F    |
| Tt-US/2011 BCF20110815-LA001_KU720624 | G   | M   | L   | L   | T   | T   | V    | I    | D    | E    | Q    | E    | I    | T    | G    | I    | F    |
| La-DE/2007                            | S   | M   | L   | L   | M   | T   | L    | V    | D    | E    | Q    | E    | I    | T    | G    | I    | F    |
| La-NL/2011 11.2                       | S   | M   | I   | V   | M   | I   | L    | V    | D    | E    | Q    | E    | I    | K    | G    | I    | F    |

| Sequence                              | 1120 | 1129 | 1161 | 1170 | 1192 | 1194 | 1196 | 1228 | 1237 | 1253 | 1254 | 1275 | 1343 | 1388 | 1611 | 1627 | 1696 |
|---------------------------------------|------|------|------|------|------|------|------|------|------|------|------|------|------|------|------|------|------|
| Sc-ES/1990_AJ608288                   | V    | R    | V    | I    | G    | A    | C    | A    | S    | D    | Q    | R    | I    | S    | Y    | S    | I    |
| Sc-ES/1990 16A                        | G    | S    | D    | M    | V    | S    | C    | V    | A    | E    | Q    | R    | I    | R    | H    | S    | I    |
| Sc-ES/1990 muc                        | G    | S    | D    | M    | V    | S    | C    | V    | A    | E    | Q    | R    | I    | R    | H    | S    | I    |
| Bp-DK/2016                            | G    | S    | D    | M    | V    | S    | C    | V    | A    | E    | Q    | R    | I    | R    | H    | S    | I    |
| Sc-IT/2008 IZSPLV_MF589987            | G    | S    | D    | M    | G    | A    | F    | V    | A    | E    | Q    | R    | I    | R    | H    | S    | I    |
| Sc-IT/2010 156                        | G    | S    | D    | M    | V    | S    | C    | V    | A    | E    | Q    | R    | I    | R    | H    | S    | I    |
| Bp-IT/2013 Bph                        | G    | S    | D    | M    | V    | S    | C    | V    | A    | E    | Q    | R    | I    | R    | H    | S    | I    |
| Sl-US/2010 GW2010007A_KU720623        | G    | S    | D    | M    | V    | S    | C    | V    | A    | E    | Q    | R    | I    | R    | H    | S    | I    |
| Tt-US/2011 631MMS031711_KU720625      | G    | S    | D    | M    | V    | S    | C    | V    | A    | E    | Q    | R    | I    | R    | H    | S    | I    |
| Tt-US/2011 BCF20110815-LA001_KU720624 | G    | S    | D    | M    | V    | S    | C    | V    | A    | E    | Q    | R    | I    | R    | H    | S    | I    |
| La-DE/2007                            | G    | S    | D    | M    | V    | S    | C    | V    | A    | E    | R    | R    | V    | R    | H    | P    | T    |
| La-NL/2011 11.2                       | G    | S    | D    | M    | V    | S    | C    | V    | A    | E    | Q    | K    | V    | R    | H    | P    | T    |

| Sequence                              | 1698 | 1745 | 1748 | 1811 | 1867 | 1969 | 1972 | 1977 | 2000 | 2001 | 2005 | 2016 | 2072 | 2088 | 2107 | 2147 | 2155 |
|---------------------------------------|------|------|------|------|------|------|------|------|------|------|------|------|------|------|------|------|------|
| Sc-ES/1990_AJ608288                   | A    | R    | N    | R    | I    | N    | G    | L    | Y    | L    | I    | R    | E    | A    | I    | R    | P    |
| Sc-ES/1990 16A                        | A    | R    | S    | S    | I    | N    | G    | I    | C    | I    | V    | R    | E    | A    | I    | K    | Q    |
| Sc-ES/1990 muc                        | A    | R    | S    | S    | I    | N    | G    | I    | C    | I    | V    | R    | E    | A    | I    | K    | Q    |
| Bp-DK/2016                            | A    | R    | S    | S    | I    | N    | G    | I    | C    | I    | V    | R    | E    | A    | I    | K    | Q    |
| Sc-IT/2008 IZSPLV_MF589987            | A    | R    | S    | S    | I    | N    | G    | I    | C    | I    | V    | R    | E    | A    | I    | K    | Q    |
| Sc-IT/2010 156                        | A    | R    | S    | S    | I    | N    | G    | I    | C    | I    | V    | R    | E    | A    | I    | K    | Q    |
| Bp-IT/2013 Bph                        | A    | R    | S    | S    | I    | N    | G    | I    | C    | I    | V    | R    | E    | A    | I    | K    | Q    |
| Sl-US/2010 GW2010007A_KU720623        | A    | R    | S    | S    | I    | N    | V    | I    | C    | I    | V    | I    | D    | V    | I    | K    | Q    |
| Tt-US/2011 631MMS031711_KU720625      | A    | R    | S    | S    | I    | N    | V    | I    | C    | I    | V    | I    | E    | V    | I    | K    | Q    |
| Tt-US/2011 BCF20110815-LA001_KU720624 | A    | R    | S    | S    | I    | N    | V    | I    | C    | I    | V    | I    | E    | V    | I    | K    | Q    |
| La-DE/2007                            | S    | R    | S    | R    | V    | N    | G    | I    | C    | I    | V    | R    | E    | A    | N    | K    | Q    |
| La-NL/2011 11.2                       | A    | K    | S    | R    | V    | D    | G    | I    | C    | I    | V    | R    | E    | A    | N    | K    | Q    |

**Supplementary Fig. 3** Amino acid changes in DMV Large protein. 28/68 changes (green) were accounted for by Sc-ES/1990 (GenBank accession no. AJ608288). Taxon names are presented as host\_country/year of collection|variant\_GenBank Accession No. Abbreviations: Bp, *Balaenoptera physalus*; Sc, *Stenella coeruleoalba*; Tt, *Tursiops truncatus*; Sl, *Stenella longirostris*; La, *Lagenorhynchus albirostris*; DMV, dolphin morbillivirus; ES, Spain; IT, Italy; US, United States of America; DK, Denmark; DE, Germany; NL, the Netherlands.
