# Supplementary material for: Evolutionary evidence for multi-host transmission of cetacean morbillivirus
Source: PubMed Central journal article supplement (PMC6279766; doi:10.1038/s41426-018-0207-x), 2018-12-05
Supplement: 41426_2018_207_MOESM6_ESM.pdf [file 41426_2018_207_MOESM6_ESM.pdf]

**Supplementary Table 1** Negative selection sites based on FEL

| <b>Protein</b> | <b>Site</b> | <b>Partition</b> | <b>alpha</b> | <b>beta</b> | <b>alpha=beta</b> | <b>LRT</b> | <b>p-value</b> | <b>Total branch length</b> |
|----------------|-------------|------------------|--------------|-------------|-------------------|------------|----------------|----------------------------|
| Nucleoprotein  | 161         | 1                | 21,474       | 0.000       | 3,089             | 5,980      | 0.014          | 3,116                      |
|                | 103         | 1                | 18,114       | 0.000       | 3,008             | 5,675      | 0.017          | 2,628                      |
|                | 397         | 1                | 11,559       | 0.000       | 2,194             | 5,294      | 0.021          | 1,677                      |
|                | 248         | 1                | 7,437        | 0.000       | 1,728             | 4,993      | 0.025          | 1,079                      |
|                | 470         | 1                | 8,020        | 0.000       | 1,876             | 5,046      | 0.025          | 1,164                      |
|                | 76          | 1                | 17,641       | 0.000       | 1,045             | 4,931      | 0.026          | 2,560                      |
|                | 439         | 1                | 8,775        | 0.000       | 1,912             | 4,911      | 0.027          | 1,273                      |
|                | 319         | 1                | 9,182        | 0.000       | 1,805             | 4,840      | 0.028          | 1,332                      |
|                | 514         | 1                | 44,868       | 1,483       | 10,066            | 4,634      | 0.031          | 6,982                      |
|                | 85          | 1                | 14,984       | 0.000       | 0.819             | 4,587      | 0.032          | 2,174                      |
|                | 34          | 1                | 8,120        | 0.000       | 1,955             | 4,514      | 0.034          | 1,178                      |
|                | 520         | 1                | 16,961       | 0.000       | 0.968             | 4,467      | 0.035          | 2,461                      |
|                | 151         | 1                | 17,663       | 0.000       | 1,032             | 4,083      | 0.043          | 2,563                      |
|                | 38          | 1                | 11,171       | 0.000       | 0.837             | 4,023      | 0.045          | 1,621                      |
|                | 487         | 1                | 20,358       | 0.000       | 1,817             | 4,012      | 0.045          | 2,954                      |
|                | 56          | 1                | 13,549       | 0.000       | 1,031             | 3,969      | 0.046          | 1,966                      |
|                | 63          | 1                | 14,905       | 0.000       | 1,207             | 3,969      | 0.046          | 2,163                      |
|                | 412         | 1                | 6,034        | 0.000       | 1,012             | 3,917      | 0.048          | 0.875                      |
|                | 90          | 1                | 6,974        | 0.000       | 2,397             | 3,861      | 0.049          | 1,012                      |
|                | 283         | 1                | 6,034        | 0.000       | 1,068             | 3,877      | 0.049          | 0.875                      |
| Phosphoprotein | 480         | 1                | 18,973       | 0.000       | 2,621             | 6,617      | 0.010          | 1,618                      |
|                | 103         | 1                | 49,500       | 0.000       | 1,914             | 5,441      | 0.020          | 4,221                      |
|                | 337         | 1                | 20,081       | 0.000       | 3,959             | 5,442      | 0.020          | 1,713                      |
|                | 347         | 1                | 36,637       | 0.000       | 1,937             | 5,244      | 0.022          | 3,124                      |
|                | 190         | 1                | 16,486       | 0.000       | 5,598             | 4,844      | 0.028          | 1,406                      |
|                | 216         | 1                | 14,115       | 0.000       | 3,378             | 4,787      | 0.029          | 1,204                      |
|                | 498         | 1                | 23,567       | 0.000       | 2,954             | 4,777      | 0.029          | 2,010                      |
|                | 396         | 1                | 10,971       | 0.000       | 3,168             | 4,416      | 0.036          | 0.936                      |
|                | 386         | 1                | 11,729       | 0.000       | 2,157             | 4,043      | 0.044          | 1,000                      |
|                | 338         | 1                | 11,626       | 0.000       | 2,254             | 3,830      | 0.050          | 0.992                      |
| Matrix         | 140         | 1                | 25156        | 0.000       | 5109              | 7315       | 0.007          | 4740                       |
|                | 242         | 1                | 17547        | 0.000       | 2443              | 6328       | 0.012          | 3306                       |
|                | 169         | 1                | 9921         | 0.000       | 1952              | 5210       | 0.022          | 1869                       |
|                | 58          | 1                | 10901        | 0.000       | 1081              | 4924       | 0.026          | 2054                       |
|                | 83          | 1                | 8547         | 0.000       | 0.986             | 4979       | 0.026          | 1610                       |
|                | 179         | 1                | 18199        | 0.000       | 0.864             | 4760       | 0.029          | 3429                       |
|                | 279         | 1                | 10305        | 0.000       | 0.948             | 4769       | 0.029          | 1942                       |
|                | 158         | 1                | 7439         | 0.000       | 2548              | 4692       | 0.030          | 1402                       |

|        |     |       |       |       |       |       |       |      |
|--------|-----|-------|-------|-------|-------|-------|-------|------|
| 259    | 1   | 13350 | 0.000 | 0.778 | 4672  | 0.031 | 2515  |      |
| 262    | 1   | 13350 | 0.000 | 0.795 | 4630  | 0.031 | 2515  |      |
| 290    | 1   | 13561 | 0.000 | 0.776 | 4646  | 0.031 | 2555  |      |
| 253    | 1   | 9087  | 0.000 | 2129  | 4575  | 0.032 | 1712  |      |
| 181    | 1   | 12855 | 0.000 | 0.753 | 4299  | 0.038 | 2422  |      |
| 280    | 1   | 6766  | 0.000 | 1838  | 4321  | 0.038 | 1275  |      |
| 5      | 1   | 14152 | 0.000 | 0.828 | 4200  | 0.040 | 2667  |      |
| 211    | 1   | 11916 | 0.000 | 0.754 | 4226  | 0.040 | 2245  |      |
| 216    | 1   | 10209 | 0.000 | 0.604 | 4160  | 0.041 | 1924  |      |
| 237    | 1   | 12472 | 0.000 | 0.736 | 4158  | 0.041 | 2350  |      |
| 302    | 1   | 7036  | 0.000 | 1066  | 4168  | 0.041 | 1326  |      |
| 141    | 1   | 11841 | 0.000 | 0.738 | 4151  | 0.042 | 2231  |      |
| 117    | 1   | 6176  | 0.000 | 0.742 | 4044  | 0.044 | 1164  |      |
| 131    | 1   | 8988  | 0.000 | 0.594 | 4012  | 0.045 | 1693  |      |
| 205    | 1   | 6176  | 0.000 | 0.731 | 4019  | 0.045 | 1164  |      |
| 272    | 1   | 8938  | 0.000 | 0.593 | 4006  | 0.045 | 1684  |      |
| 84     | 1   | 5896  | 0.000 | 0.736 | 3974  | 0.046 | 1111  |      |
| 87     | 1   | 8988  | 0.000 | 0.597 | 3971  | 0.046 | 1693  |      |
| 294    | 1   | 11841 | 0.000 | 0.823 | 3997  | 0.046 | 2231  |      |
| 69     | 1   | 6027  | 0.000 | 0.922 | 3897  | 0.048 | 1136  |      |
| 27     | 1   | 7986  | 0.000 | 0.593 | 3826  | 0.050 | 1505  |      |
| Fusion | 437 | 1     | 17483 | 0.000 | 1528  | 8418  | 0.004 | 2451 |
|        | 284 | 1     | 18822 | 0.000 | 0.883 | 6146  | 0.013 | 2639 |
|        | 96  | 1     | 33271 | 0.000 | 1735  | 5979  | 0.014 | 4664 |
|        | 454 | 1     | 36047 | 0.000 | 1785  | 6007  | 0.014 | 5054 |
|        | 160 | 1     | 14105 | 0.000 | 2608  | 5897  | 0.015 | 1977 |
|        | 333 | 1     | 16036 | 0.000 | 2239  | 5861  | 0.015 | 2248 |
|        | 398 | 1     | 15120 | 0.000 | 2443  | 5476  | 0.019 | 2120 |
|        | 138 | 1     | 7753  | 0.000 | 1136  | 4948  | 0.026 | 1087 |
|        | 190 | 1     | 9270  | 0.000 | 1714  | 4989  | 0.026 | 1300 |
|        | 196 | 1     | 9056  | 0.000 | 2206  | 4931  | 0.026 | 1270 |
|        | 448 | 1     | 13512 | 0.000 | 1263  | 4906  | 0.027 | 1894 |
|        | 226 | 1     | 8679  | 0.000 | 1355  | 4779  | 0.029 | 1217 |
|        | 342 | 1     | 7677  | 0.000 | 1820  | 4796  | 0.029 | 1076 |
|        | 400 | 1     | 13858 | 0.000 | 2070  | 4651  | 0.031 | 1943 |
|        | 412 | 1     | 15893 | 0.000 | 1161  | 4627  | 0.031 | 2228 |
|        | 489 | 1     | 7753  | 0.000 | 1356  | 4675  | 0.031 | 1087 |
|        | 517 | 1     | 13858 | 0.000 | 2070  | 4651  | 0.031 | 1943 |
|        | 442 | 1     | 10453 | 0.000 | 2121  | 4544  | 0.033 | 1465 |
|        | 44  | 1     | 13009 | 0.000 | 0.691 | 4266  | 0.039 | 1824 |
|        | 515 | 1     | 9853  | 0.000 | 3270  | 4254  | 0.039 | 1381 |

|               |      |   |        |       |       |        |       |       |
|---------------|------|---|--------|-------|-------|--------|-------|-------|
|               | 100  | 1 | 12463  | 0.000 | 0.994 | 4159   | 0.041 | 1747  |
|               | 184  | 1 | 10387  | 0.000 | 1065  | 4107   | 0.043 | 1456  |
|               | 334  | 1 | 9052   | 0.000 | 1249  | 4007   | 0.045 | 1269  |
|               | 514  | 1 | 9460   | 0.000 | 0.888 | 4010   | 0.045 | 1326  |
|               | 328  | 1 | 15346  | 0.000 | 0.907 | 3971   | 0.046 | 2151  |
|               | 40   | 1 | 8880   | 0.000 | 0.904 | 3945   | 0.047 | 1245  |
|               | 394  | 1 | 6118   | 0.000 | 1921  | 3898   | 0.048 | 0.858 |
| Hemagglutinin | 77   | 1 | 34493  | 0.000 | 0.905 | 6481   | 0.011 | 5606  |
|               | 97   | 1 | 16121  | 0.000 | 2608  | 5812   | 0.016 | 2620  |
|               | 7    | 1 | 16730  | 0.000 | 2181  | 5687   | 0.017 | 2719  |
|               | 57   | 1 | 11406  | 0.000 | 1596  | 5664   | 0.017 | 1854  |
|               | 575  | 1 | 24476  | 0.000 | 0.761 | 5682   | 0.017 | 3978  |
|               | 571  | 1 | 12695  | 0.000 | 2101  | 5615   | 0.018 | 2063  |
|               | 282  | 1 | 28277  | 0.000 | 1011  | 5429   | 0.020 | 4596  |
|               | 446  | 1 | 24476  | 0.000 | 0.954 | 5409   | 0.020 | 3978  |
|               | 43   | 1 | 10589  | 0.000 | 1214  | 5227   | 0.022 | 1721  |
|               | 63   | 1 | 7578   | 0.000 | 1443  | 5279   | 0.022 | 1232  |
|               | 281  | 1 | 21260  | 0.000 | 0.953 | 5275   | 0.022 | 3455  |
|               | 18   | 1 | 7531   | 0.000 | 1368  | 5175   | 0.023 | 1224  |
|               | 324  | 1 | 23772  | 0.000 | 0.717 | 5135   | 0.023 | 3864  |
|               | 377  | 1 | 18423  | 0.000 | 0.765 | 4912   | 0.027 | 2994  |
|               | 529  | 1 | 6742   | 0.000 | 1647  | 4811   | 0.028 | 1096  |
|               | 55   | 1 | 11263  | 0.000 | 2177  | 4688   | 0.030 | 1830  |
|               | 11   | 1 | 18423  | 0.000 | 0.899 | 4654   | 0.031 | 2994  |
|               | 459  | 1 | 7578   | 0.000 | 1962  | 4613   | 0.032 | 1232  |
|               | 340  | 1 | 7531   | 0.000 | 1738  | 4567   | 0.033 | 1224  |
|               | 349  | 1 | 7531   | 0.000 | 1738  | 4567   | 0.033 | 1224  |
|               | 399  | 1 | 20008  | 0.000 | 0.746 | 4507   | 0.034 | 3252  |
|               | 508  | 1 | 7578   | 0.000 | 1785  | 4519   | 0.034 | 1232  |
|               | 504  | 1 | 8034   | 0.000 | 1448  | 4378   | 0.036 | 1306  |
|               | 100  | 1 | 12532  | 0.000 | 0.697 | 4127   | 0.042 | 2037  |
|               | 286  | 1 | 14890  | 0.000 | 1064  | 4005   | 0.045 | 2420  |
|               | 535  | 1 | 21708  | 0.000 | 0.837 | 4020   | 0.045 | 3528  |
| Large Protein | 1418 | 1 | 45.309 | 0     | 5.836 | 11.187 | 0.001 | 6.998 |
|               | 778  | 1 | 31.28  | 0     | 4.482 | 9.806  | 0.002 | 4.831 |
|               | 586  | 1 | 34.653 | 0     | 6.049 | 9.104  | 0.003 | 5.352 |
|               | 384  | 1 | 21.853 | 0     | 4.574 | 8.082  | 0.004 | 3.375 |
|               | 411  | 1 | 37.341 | 0     | 5.485 | 8.257  | 0.004 | 5.767 |
|               | 439  | 1 | 49.136 | 0     | 1.175 | 7.96   | 0.005 | 7.589 |
|               | 527  | 1 | 33.01  | 0     | 2.311 | 7.652  | 0.006 | 5.098 |
|               | 2183 | 1 | 42.315 | 0     | 1.087 | 7.697  | 0.006 | 6.536 |

---

|      |   |        |   |       |       |       |        |
|------|---|--------|---|-------|-------|-------|--------|
| 1150 | 1 | 19.223 | 0 | 3.121 | 7.325 | 0.007 | 2.969  |
| 1280 | 1 | 80.844 | 0 | 0.992 | 7.236 | 0.007 | 12.486 |
| 1297 | 1 | 18.469 | 0 | 4.325 | 7.312 | 0.007 | 2.853  |
| 64   | 1 | 28.325 | 0 | 2.697 | 6.95  | 0.008 | 4.375  |
| 99   | 1 | 29.628 | 0 | 1.455 | 7.069 | 0.008 | 4.576  |
| 1772 | 1 | 16.775 | 0 | 3.557 | 6.93  | 0.008 | 2.591  |
| 58   | 1 | 15.031 | 0 | 3.232 | 6.823 | 0.009 | 2.322  |
| 225  | 1 | 22.491 | 0 | 2.388 | 6.56  | 0.01  | 3.474  |
| 1227 | 1 | 22.491 | 0 | 2.388 | 6.56  | 0.01  | 3.474  |
| 1723 | 1 | 22.001 | 0 | 2.425 | 6.455 | 0.011 | 3.398  |
| 2089 | 1 | 31.247 | 0 | 0.883 | 6.32  | 0.012 | 4.826  |
| 310  | 1 | 22.351 | 0 | 1.606 | 6.121 | 0.013 | 3.452  |
| 575  | 1 | 17.615 | 0 | 2.555 | 6.179 | 0.013 | 2.721  |
| 952  | 1 | 34.226 | 0 | 1.06  | 6.119 | 0.013 | 5.286  |
| 954  | 1 | 12.479 | 0 | 1.52  | 6.123 | 0.013 | 1.927  |
| 1811 | 1 | 24.175 | 0 | 0.728 | 6.17  | 0.013 | 3.734  |
| 429  | 1 | 17.402 | 0 | 2.321 | 6.051 | 0.014 | 2.688  |
| 604  | 1 | 30.403 | 0 | 0.911 | 6.054 | 0.014 | 4.696  |
| 1377 | 1 | 29.485 | 0 | 0.912 | 6.054 | 0.014 | 4.554  |
| 2127 | 1 | 10.786 | 0 | 1.507 | 5.997 | 0.014 | 1.666  |
| 2164 | 1 | 16.211 | 0 | 2.323 | 5.997 | 0.014 | 2.504  |
| 420  | 1 | 23.208 | 0 | 0.983 | 5.968 | 0.015 | 3.585  |
| 562  | 1 | 29.485 | 0 | 1.054 | 5.912 | 0.015 | 4.554  |
| 1519 | 1 | 24.175 | 0 | 0.806 | 5.972 | 0.015 | 3.734  |
| 1861 | 1 | 24.175 | 0 | 0.875 | 5.894 | 0.015 | 3.734  |
| 203  | 1 | 23.467 | 0 | 2.194 | 5.854 | 0.016 | 3.625  |
| 1590 | 1 | 29.485 | 0 | 1.06  | 5.808 | 0.016 | 4.554  |
| 293  | 1 | 19.522 | 0 | 5.83  | 5.721 | 0.017 | 3.015  |
| 1632 | 1 | 25.676 | 0 | 0.726 | 5.684 | 0.017 | 3.966  |
| 80   | 1 | 10.758 | 0 | 1.578 | 5.578 | 0.018 | 1.662  |
| 512  | 1 | 24.175 | 0 | 1.045 | 5.629 | 0.018 | 3.734  |
| 1139 | 1 | 9.702  | 0 | 1.623 | 5.602 | 0.018 | 1.499  |
| 406  | 1 | 15.714 | 0 | 0.938 | 5.524 | 0.019 | 2.427  |
| 1158 | 1 | 23.601 | 0 | 0.805 | 5.5   | 0.019 | 3.645  |
| 1193 | 1 | 11.096 | 0 | 1.531 | 5.468 | 0.019 | 1.714  |
| 1483 | 1 | 24.175 | 0 | 1.052 | 5.525 | 0.019 | 3.734  |
| 226  | 1 | 22.248 | 0 | 0.972 | 5.436 | 0.02  | 3.436  |
| 536  | 1 | 19.182 | 0 | 0.964 | 5.233 | 0.022 | 2.963  |
| 1219 | 1 | 19.182 | 0 | 0.964 | 5.233 | 0.022 | 2.963  |
| 1249 | 1 | 24.175 | 0 | 1.345 | 5.187 | 0.023 | 3.734  |
| 1459 | 1 | 16.895 | 0 | 1.718 | 5.189 | 0.023 | 2.609  |

---

---

|      |   |        |   |       |       |       |       |
|------|---|--------|---|-------|-------|-------|-------|
| 1594 | 1 | 18.589 | 0 | 0.909 | 5.154 | 0.023 | 2.871 |
| 394  | 1 | 7.726  | 0 | 1.014 | 5.073 | 0.024 | 1.193 |
| 739  | 1 | 11.367 | 0 | 2.37  | 5.069 | 0.024 | 1.756 |
| 835  | 1 | 7.726  | 0 | 1.014 | 5.073 | 0.024 | 1.193 |
| 1790 | 1 | 7.726  | 0 | 1.014 | 5.073 | 0.024 | 1.193 |
| 2055 | 1 | 7.726  | 0 | 1.014 | 5.073 | 0.024 | 1.193 |
| 2145 | 1 | 10.273 | 0 | 1.874 | 5.032 | 0.025 | 1.587 |
| 405  | 1 | 7.369  | 0 | 1.02  | 4.972 | 0.026 | 1.138 |
| 460  | 1 | 12.608 | 0 | 3.511 | 4.923 | 0.026 | 1.947 |
| 1001 | 1 | 7.726  | 0 | 1.088 | 4.931 | 0.026 | 1.193 |
| 1151 | 1 | 7.369  | 0 | 1.02  | 4.972 | 0.026 | 1.138 |
| 1183 | 1 | 6.087  | 0 | 1.113 | 4.938 | 0.026 | 0.94  |
| 46   | 1 | 13.961 | 0 | 1.225 | 4.915 | 0.027 | 2.156 |
| 934  | 1 | 7.726  | 0 | 1.103 | 4.8   | 0.028 | 1.193 |
| 1259 | 1 | 7.369  | 0 | 1.078 | 4.854 | 0.028 | 1.138 |
| 1648 | 1 | 7.369  | 0 | 1.078 | 4.854 | 0.028 | 1.138 |
| 2037 | 1 | 5.779  | 0 | 1.1   | 4.855 | 0.028 | 0.893 |
| 376  | 1 | 23.767 | 0 | 1.567 | 4.689 | 0.03  | 3.671 |
| 680  | 1 | 6.087  | 0 | 1.201 | 4.727 | 0.03  | 0.94  |
| 714  | 1 | 7.369  | 0 | 1.095 | 4.723 | 0.03  | 1.138 |
| 1097 | 1 | 7.369  | 0 | 1.095 | 4.723 | 0.03  | 1.138 |
| 1550 | 1 | 7.369  | 0 | 1.095 | 4.723 | 0.03  | 1.138 |
| 1082 | 1 | 16.584 | 0 | 0.995 | 4.664 | 0.031 | 2.561 |
| 1213 | 1 | 20.627 | 0 | 1.002 | 4.673 | 0.031 | 3.186 |
| 2050 | 1 | 5.792  | 0 | 1.188 | 4.646 | 0.031 | 0.895 |
| 655  | 1 | 7.726  | 0 | 1.289 | 4.611 | 0.032 | 1.193 |
| 1721 | 1 | 6.087  | 0 | 1.205 | 4.596 | 0.032 | 0.94  |
| 1927 | 1 | 22.248 | 0 | 1.56  | 4.611 | 0.032 | 3.436 |
| 1953 | 1 | 7.726  | 0 | 1.289 | 4.611 | 0.032 | 1.193 |
| 248  | 1 | 17.357 | 0 | 0.727 | 4.548 | 0.033 | 2.681 |
| 1484 | 1 | 7.369  | 0 | 1.275 | 4.536 | 0.033 | 1.138 |
| 359  | 1 | 5.792  | 0 | 1.193 | 4.514 | 0.034 | 0.895 |
| 492  | 1 | 5.792  | 0 | 1.193 | 4.514 | 0.034 | 0.895 |
| 1201 | 1 | 11.514 | 0 | 1.747 | 4.505 | 0.034 | 1.778 |
| 1349 | 1 | 11.785 | 0 | 0.688 | 4.499 | 0.034 | 1.82  |
| 1755 | 1 | 11.785 | 0 | 0.688 | 4.499 | 0.034 | 1.82  |
| 102  | 1 | 16.208 | 0 | 0.995 | 4.428 | 0.035 | 2.503 |
| 205  | 1 | 13.794 | 0 | 1.028 | 4.465 | 0.035 | 2.131 |
| 244  | 1 | 17.15  | 0 | 0.695 | 4.463 | 0.035 | 2.649 |
| 391  | 1 | 13.794 | 0 | 1.028 | 4.465 | 0.035 | 2.131 |
| 1478 | 1 | 7.369  | 0 | 1.39  | 4.421 | 0.035 | 1.138 |

---

---

|      |   |        |       |       |       |       |       |
|------|---|--------|-------|-------|-------|-------|-------|
| 1629 | 1 | 6.33   | 0     | 1.763 | 4.452 | 0.035 | 0.978 |
| 2168 | 1 | 13.794 | 0     | 1.028 | 4.465 | 0.035 | 2.131 |
| 1218 | 1 | 15.509 | 0     | 0.771 | 4.416 | 0.036 | 2.395 |
| 587  | 1 | 14.836 | 0     | 0.693 | 4.334 | 0.037 | 2.291 |
| 1476 | 1 | 8.292  | 0     | 1.327 | 4.358 | 0.037 | 1.281 |
| 2156 | 1 | 5.594  | 0     | 1.708 | 4.335 | 0.037 | 0.864 |
| 759  | 1 | 17.143 | 0     | 0.709 | 4.325 | 0.038 | 2.648 |
| 1119 | 1 | 13.158 | 0     | 0.926 | 4.321 | 0.038 | 2.032 |
| 1589 | 1 | 20.569 | 0     | 0.812 | 4.306 | 0.038 | 3.177 |
| 538  | 1 | 14.453 | 0     | 0.766 | 4.268 | 0.039 | 2.232 |
| 626  | 1 | 6.469  | 0     | 1.971 | 4.245 | 0.039 | 0.999 |
| 170  | 1 | 17.249 | 0     | 0.788 | 4.2   | 0.04  | 2.664 |
| 181  | 1 | 7.369  | 0     | 1.454 | 4.179 | 0.041 | 1.138 |
| 351  | 1 | 7.369  | 0     | 1.454 | 4.179 | 0.041 | 1.138 |
| 1072 | 1 | 5.988  | 0     | 1.127 | 4.158 | 0.041 | 0.925 |
| 1173 | 1 | 5.988  | 0     | 1.127 | 4.158 | 0.041 | 0.925 |
| 1178 | 1 | 7.369  | 0     | 1.454 | 4.179 | 0.041 | 1.138 |
| 797  | 1 | 15.022 | 0     | 0.788 | 4.116 | 0.042 | 2.32  |
| 1934 | 1 | 17.411 | 0     | 0.808 | 4.125 | 0.042 | 2.689 |
| 98   | 1 | 19.696 | 0     | 0.858 | 4.11  | 0.043 | 3.042 |
| 511  | 1 | 18.341 | 0     | 1.027 | 4.081 | 0.043 | 2.833 |
| 1375 | 1 | 16.735 | 0     | 0.807 | 4.089 | 0.043 | 2.585 |
| 145  | 1 | 17.033 | 0     | 0.85  | 4.057 | 0.044 | 2.631 |
| 1819 | 1 | 18.415 | 0     | 0.855 | 4.04  | 0.044 | 2.844 |
| 1935 | 1 | 13.37  | 0     | 0.731 | 4.001 | 0.045 | 2.065 |
| 2147 | 1 | 32.089 | 1.177 | 4.033 | 3.964 | 0.046 | 5.381 |
| 1911 | 1 | 6.994  | 0     | 0.688 | 3.947 | 0.047 | 1.08  |
| 1920 | 1 | 13.526 | 0     | 0.641 | 3.952 | 0.047 | 2.089 |
| 118  | 1 | 13.37  | 0     | 0.802 | 3.898 | 0.048 | 2.065 |
| 1399 | 1 | 16.722 | 0     | 1.018 | 3.896 | 0.048 | 2.583 |
| 471  | 1 | 6.994  | 0     | 0.717 | 3.868 | 0.049 | 1.08  |
| 1323 | 1 | 6.994  | 0     | 0.717 | 3.868 | 0.049 | 1.08  |
| 1622 | 1 | 6.994  | 0     | 0.717 | 3.868 | 0.049 | 1.08  |
| 2133 | 1 | 13.37  | 0     | 0.842 | 3.83  | 0.05  | 2.065 |

---
