# Supplementary material for: Evolutionary evidence for multi-host transmission of cetacean morbillivirus
Source: PubMed Central journal article supplement (PMC6279766; doi:10.1038/s41426-018-0207-x), 2018-12-05
Supplement: 41426_2018_207_MOESM7_ESM.pdf [file 41426_2018_207_MOESM7_ESM.pdf]

**Supplementary Table 2** Wildtype morbilliviruses Hemagglutinin-SLAM interactions sites

| Receptor     | H                  | MV           | RPV          | PPRV                       | CeMV         |              | CDV          | PDV          |              |
|--------------|--------------------|--------------|--------------|----------------------------|--------------|--------------|--------------|--------------|--------------|
|              |                    |              |              |                            | DMV          | PMV          |              |              |              |
| SLAM*        | Site I             | <b>D 505</b> | <b>D 505</b> | <b>D 505</b>               | <b>D 501</b> | <b>D 501</b> | <b>D 501</b> | <b>D 501</b> |              |
|              |                    | <b>D 507</b> | <b>D 507</b> | <b>D 507</b>               | <b>D 503</b> | <b>D 503</b> | <b>D 503</b> | <b>D 503</b> |              |
|              | Site II            | <b>D 530</b> | <b>D 530</b> | <b>D 530</b>               | <b>D 526</b> | <b>D 526</b> | <b>D 526</b> | <b>D 526</b> |              |
|              |                    | T 531        | I 531        | V 531                      | T 527        | T 527        | V 527        | V 527        |              |
|              |                    | <b>S 532</b> | <b>S 532</b> | <b>S 532</b>               | <b>S 528</b> | <b>S 528</b> | <b>S 528</b> | <b>S 528</b> |              |
|              |                    | <b>R 533</b> | <b>R 533</b> | <b>R 533</b>               | <b>R 529</b> | <b>R 529</b> | <b>R 529</b> | <b>R 529</b> |              |
|              |                    | F 552        | Y 552        | F 552                      | <b>F 548</b> | <b>L 548</b> | T 548        | T 548        |              |
|              |                    | <b>P 554</b> | <b>P 554</b> | <b>P 554</b>               | <b>P 550</b> | <b>P 550</b> | <b>P 550</b> | <b>P 550</b> |              |
|              | Site III           | P 191        | P 191        | R 191                      | S 191        | S 191        | A 191        | A 191        |              |
|              |                    | T 192        | T 192        | T 192                      | V 192        | V 192        | T 192        | T 192        |              |
|              |                    | T 193        | T 193        | V 193                      | I 193        | I 193        | T 193        | T 193        |              |
|              |                    | I 194        | T 194        | T 194                      | T 194        | T 194        | S 194        | S 194        |              |
|              |                    | R 195        | K 195        | R 195                      | R 195        | R 195        | V 195        | M 195        |              |
|              | Site IV            | <b>Y 524</b> | <b>Y 524</b> | <b>Y 524</b>               | <b>Y 520</b> | <b>Y 520</b> | <b>Y 520</b> | <b>Y 520</b> |              |
|              |                    | Y 541        | H 541        | Y 541                      | Y 537        | Y 537        | Y 537        | Y 537        |              |
|              |                    | <b>Y 543</b> | <b>Y 543</b> | <b>Y 543</b>               | <b>Y 539</b> | <b>Y 539</b> | <b>Y 539</b> | <b>Y 539</b> |              |
|              |                    | F 552        | Y 552        | F 552                      | <b>F 548</b> | <b>L 548</b> | T 548        | T 548        |              |
|              |                    | F 483        | L 483        | L 483                      | L 479        | L 479        | L 479        | L 479        |              |
|              |                    | P 545        | T 545        | T 545                      | T 541        | T 541        | P 541        | P 541        |              |
|              | PVRL4 <sup>#</sup> | Site I       | <b>Y 524</b> | <b>Y 524</b>               | <b>Y 524</b> | <b>Y 520</b> | <b>Y 520</b> | <b>Y 520</b> | <b>Y 520</b> |
|              |                    |              | L 526        | S 526                      | T 526        | T 522        | T 522        | I 522        | V 522        |
|              |                    |              | Y 541        | H 541                      | Y 541        | Y 537        | Y 537        | Y 537        | Y 537        |
|              |                    |              | <b>Y 543</b> | <b>Y 543</b>               | <b>Y 543</b> | <b>Y 539</b> | <b>Y 539</b> | <b>Y 539</b> | <b>Y 539</b> |
|              |                    |              | <b>P 458</b> | <b>P 458</b>               | <b>P 458</b> | <b>P 454</b> | <b>P 454</b> | <b>P 454</b> | <b>P 454</b> |
|              |                    |              | M 459        | L 459                      | Y 459        | L 455        | L 455        | K 455        | K 455        |
|              |                    |              | L 462        | S 462                      | S 462        | S 458        | S 458        | T 458        | T 458        |
|              |                    |              | A 463        | A 463                      | F 463        | V 459        | V 459        | V 459        | I 459        |
|              |                    |              | <b>L 464</b> | <b>L 464</b>               | <b>L 464</b> | <b>L 460</b> | <b>L 460</b> | <b>L 460</b> | <b>L 460</b> |
| <b>G 465</b> |                    |              | <b>G 465</b> | <b>G 465</b>               | <b>G 461</b> | <b>G 461</b> | <b>G 461</b> | <b>G 461</b> |              |
| L 482        |                    | I 482        | I 482        | T 478                      | T 478        | V 478        | I 478        |              |              |
| F 483        |                    | L 483        | L 483        | L 479                      | L 479        | L 479        | L 479        |              |              |
| Site II      |                    | T 498        | T 498        | I 498                      | V 494        | V 494        | I 494        | I 494        |              |
|              |                    | Y 499        | Y 499        | E 499                      | E 495        | E 495        | Q 495        | Q 495        |              |
|              |                    | <b>D 505</b> | <b>D 505</b> | <b>D 505</b>               | <b>D 501</b> | <b>D 501</b> | <b>D 501</b> | <b>D 501</b> |              |
|              |                    | L 500        | L 500        | L 500                      | L 496        | L 496        | T 496        | T 496        |              |
|              | Site III           | K 387        | R 387        | K 387                      | K 383        | K 383        | Q 383        | K 383        |              |
|              |                    | G 388        | D 388        | T 388                      | <b>S 384</b> | <b>G 384</b> | R 384        | R 384        |              |
| K 389        |                    | R 389        | R 389        | <b>R/K 385<sup>§</sup></b> | <b>R 385</b> | K 385        | R 385        |              |              |
| Q 391        |                    | P 391        | P 391        | P 387                      | P 387        | Y 387        | Y 387        |              |              |
| Y 499        |                    | Y 499        | E 499        | E 495                      | E 495        | Q 495        | Q 495        |              |              |
| L 500        |                    | L 500        | L 500        | L 496                      | L 496        | T 496        | T 496        |              |              |

Conserved regions are marked in bold, sites in which DMV and PMV differ are in green

\*Sites are based on MV-H interaction with marmoset SLAM (Hashiguchi et al 2011)

<sup>#</sup>Sites are based on MV-H interaction with human nectin-4 (Zhang et al 2013)

<sup>§</sup>In site 385, only variant DMV-DK/16 (North Sea fin whale) has a K instead of R
