# Supplementary material for: Evolutionary evidence for multi-host transmission of cetacean morbillivirus
Source: PubMed Central journal article supplement (PMC6279766; doi:10.1038/s41426-018-0207-x), 2018-12-05
Supplement: 41426_2018_207_MOESM8_ESM.pdf [file 41426_2018_207_MOESM8_ESM.pdf]

**Supplementary Table 3** Primers sets covering gap regions of DMV and PMV

| Strain | Genome                          | Gap region (bp) | Forward primer (5' – 3')   | Reverse primer (5' – 3')   |
|--------|---------------------------------|-----------------|----------------------------|----------------------------|
| DMV    | DMV/LA/NL/11.2, DE/2007, DMV_Bp | 1 – 975         | accaRacaaagYtggcta         | agaattcatgcaaccctaagg      |
|        | DMV_Bp                          | 1290 – 1805     | atcagcaggcaagggtgag        | agatttgagacactcaagtccc     |
|        | DMV/LA/NL/11.2, DE/2007         | 1929 – 2905     | atcaagcgagagtcacacc        | agttctacgtctgcagtaggac     |
|        | DMV/LA/NL/11.2                  | 3856 – 4652     | atgtgtcaatcttatccac        | aRcttMtatgtgcatgc          |
|        | DMV/LA/NL/11.2                  | 5671 – 6257     | agataactgcaggagttgcc       | ttagatagccattggtcgc        |
|        | DMV/LA/NL/11.2                  | 6888 – 7898     | aagcctgatctaacaggactacc    | ttgtcatctgcagcacKg         |
|        | DMV/LA/NL/11.2, DE/2007         | 8420 – 9456     | agtagcaatcaagactggctg      | actgcYtatccctagccttg       |
|        | DMV/LA/NL/11.2                  | 9720 – 10201    | atggacttatgtactgcatgtag    | ttcatcatagtctcgtagttgataac |
|        | DMV/LA/NL/11.2                  | 12189 – 12997   | atggatagacacatMatcaKacctag | tggtgtatacctcgctactcgg     |
|        | DMV/LA/NL/11.2                  | 14479 – 14917   | tgtcagtcgagcttagatctgg     | aatactagataacactcagtgagat  |
| PMV    | 53                              | 1459 – 1946     | atgccataccaagaggtacaag     | tgacgactctcgcttgagtc       |
