# Supplementary material for: Evolutionary evidence for multi-host transmission of cetacean morbillivirus
Source: PubMed Central journal article supplement (PMC6279766; doi:10.1038/s41426-018-0207-x), 2018-12-05
Supplement: 41426_2018_207_MOESM9_ESM.pdf [file 41426_2018_207_MOESM9_ESM.pdf]

**Supplementary Table 4.** Primer sets used to amplify and sequence full-length genome of DMV-DK/16

| Gap region (bp) | Forward primer (5' – 3')         | Reverse primer (5' – 3')  | Type of primer |
|-----------------|----------------------------------|---------------------------|----------------|
| 176 – 1325      | ttcaggaggagccataagagggattaagcatg | agctctgctgcattagcctg      | PCR            |
| 1220 – 2530     | atcagcaggcaaggtag                | cggctcctgcccagataa        | PCR            |
| 2442 – 4486     | aattccaacctcagtgcc               | ggatgaactagctatgagcct     | PCR            |
| 4046 – 4959     | atacatgagcatgatgagagacc          | ctcttgctatgagagatct       | PCR            |
| 4939 – 5885     | agatctcgcataaggcaaagag           | aatttctgcttagcatctcgc     | PCR            |
| 5791 – 7015     | actgtctagctgtcaaggggt            | ctcaggtatgaccaataatccagta | PCR            |
| 6888 – 8538     | gcctgatctaacaggtactaccaa         | cgactgcagttgtaagggtat     | PCR            |
| 8331 – 9893     | gaggactcaggtctagagcttgat         | ggctctaataatgccacgatt     | PCR            |
| 9767 – 11177    | ctgcaatgactgtggacccta            | ggacagtgaggatcgctta       | PCR            |
| 10991 – 12578   | aggcttacgagactgtcagtg            | cataatgaacaagactcatgacg   | PCR            |
| 12483 – 14023   | cgcaagaggaaggtcgat               | tcggtcatcattccaatcc       | PCR            |
| 13882 – 15702   | ctgcatgactgtactgtaatgc           | accagacaaagctgggtatag     | PCR            |
| 662             | agatactgcagctgactccgagacg        | -                         | Sequencing     |
| 955             | ccttagggtgcatgaattctc            | -                         | Sequencing     |
| 1750            | agtccaaggaattgacctccacatc        | -                         | Sequencing     |
| 2174            | atgctgacctgctcgtggtcc            | -                         | Sequencing     |
| 2953            | actgcagacgtagaactcaatcccg        | -                         | Sequencing     |
| 3183            | gagtgtgcttgcctcatgattaagtc       | -                         | Sequencing     |
| 3528            | cctcaagttagattatagatccaggct      | -                         | Sequencing     |
| 5400            | agtgccagctataaagtgatgaccagg      | -                         | Sequencing     |
| 6132            | gcatacccgactctatcagaggtcaa       | -                         | Sequencing     |
| 6548            | agttgaggtagacggaatcacaatcc       | -                         | Sequencing     |
| 7379            | aagatcatcgagacgaagtgg            | -                         | Sequencing     |
| 7802            | gacctgatgatccattgagttcaa         | -                         | Sequencing     |
| 8222            | actcaagcatttgcaagagtagaccacc     | -                         | Sequencing     |
| 8802            | ggcaactctggtgcatcactactgcat      | -                         | Sequencing     |
| 9196            | gggtcgagaatggtactccaatca         | -                         | Sequencing     |
| 9559            | ctgagatgcggtccatcatcaa           | -                         | Sequencing     |
| 10179           | atcaactacgagactatgatgaagggtc     | -                         | Sequencing     |
| 10597           | atggctcctatttgaagaccctg          | -                         | Sequencing     |
| 11456           | aatcctaaggcagcgattgcacg          | -                         | Sequencing     |
| 11822           | gattaagatggcactactacgtgctc       | -                         | Sequencing     |
| 12053           | atgtgtccagagtatcactcggc          | -                         | Sequencing     |
| 12945           | acatcgtaatccgagtagcgagg          | -                         | Sequencing     |
| 13248           | ccaatcattgagaaggatgcgta          | -                         | Sequencing     |
| 13726           | atctcacggtctgtaacatgatctaccac    | -                         | Sequencing     |
| 14318           | gaactcatctgctgctacaaggca         | -                         | Sequencing     |
| 14595           | ccagaggtgacatgggtaggtaatgtaga    | -                         | Sequencing     |
| 14986           | taagaacatcaccgggattttagcac       | -                         | Sequencing     |
| 15189           | gcgtctggatcagaggtctgtcaa         | -                         | Sequencing     |
