# Supplementary material for: Evolutionary evidence for multi-host transmission of cetacean morbillivirus
Source: PubMed Central journal article supplement (PMC6279766; doi:10.1038/s41426-018-0207-x), 2018-12-05
Supplement: 41426_2018_207_MOESM10_ESM.pdf [file 41426_2018_207_MOESM10_ESM.pdf]

**Supplementary Table 5** RACE primer for DMV and PMV

| <b>Strain</b> | <b>Primer</b>            | <b>Region (bp)</b> | <b>Primer (5' – 3')</b>  |
|---------------|--------------------------|--------------------|--------------------------|
| DMV           | Leader-outer             | 291                | RV-ggtcaccagcaagtctactaa |
|               | Leader-inner             | 142                | RV-ttgaacagagctagactccg  |
|               | Trailer-outer            | 15622              | FW-tcctgtcagagtgatcag    |
|               | Trailer-inner            | 15558              | FW-aagttgatagggtacgggtgc |
| PMV           | Leader-outer             | 172                | RV-attgctcctcctgaacctg   |
|               | Leader-inner             | 103                | RV-agaagtgctgccatgattg   |
|               | Trailer-outer            | 15601              | FW-tagaacggatccctactcct  |
|               | Trailer-inner            | 15556              | FW-ttaagctgatagggtatggc  |
| -             | Adaptor <sup>a</sup>     | -                  | gactcgagtcgacatcg        |
| -             | T17 adaptor <sup>a</sup> | -                  | gactcgagtcgacatcg(T)17   |

FW = forward; RV = reverse, <sup>a</sup>reference
